# Supplementary material for: Limited contribution of health behaviours to expanding income-related chronic disease disparities based on a nationwide cross-sectional study in China
Source: PubMed Central journal article supplement (PMC6104030; doi:10.1038/s41598-018-30256-5), 2018-08-21
Supplement: 41598_2018_30256_MOESM1_ESM.pdf [file 41598_2018_30256_MOESM1_ESM.pdf]

**Income-related health disparities in chronic diseases and the role of  
health behaviors, Evidence from China**

Qing Wang, Ph.D. <sup>a,\*</sup>, Jay J. Shen, PhD <sup>b</sup>, Kaitlyn Frakes, B.S. <sup>c</sup>

<sup>a</sup> School of business, Dalian University of Technology, Panjin, 124221, Liaoning,  
China.

Corresponding author. E-mail address, wangqing1984@126.com. Tel,  
8618811795046.

<sup>b</sup> Department of Health Care Administration and Policy, School of Community  
Health Sciences, University of Nevada Las Vegas. 4505 Maryland Parkway, Las  
Vegas, NV 89154-3023, USA. jay.shen@unlv.edu

<sup>c</sup> Department of Health Care Administration and Policy, School of Community  
Health Sciences, University of Nevada Las Vegas. 4505 Maryland Parkway, Las  
Vegas, NV 89154-3023, USA. frakek1@unlv.nevada.edu

**Appendix table 1 Weighted prevalence of CVD and hypertension by income**

| Characteristics | High Income | Medium Income | Low Income |
|-----------------|-------------|---------------|------------|
| CVD             | 12.35       | 13.03         | 13.26      |
| Hypertension    | 33.40       | 36.95         | 40.99      |
